# Supplementary material for: LOXL2 catalytically inactive mutants mediate epithelial-to-mesenchymal transition
Source: PubMed Central journal article supplement (PMC3925316; doi:10.1242/bio.20146841), 2014-01-03
Supplement: supp_bio.20146841_bio.20146841-s1.pdf [file supp_bio.20146841_bio.20146841-s1.pdf]

Supplementary Material

Eva P. Cuevas et al. doi: 10.1242/bio.20146841

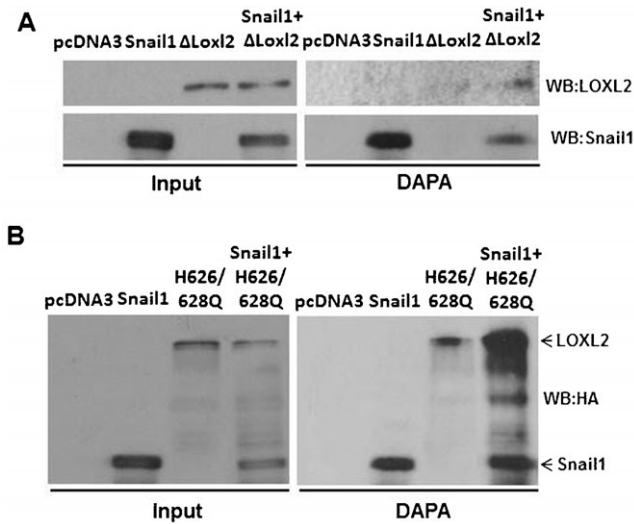

**Fig. S1. Co-expression of Snail1 and LOXL2 mutants increases Snail1 binding to the E-pal element of the E-cadherin promoter.** DAPA assays comparing the binding affinity to the E-pal probe of Snail1 and/or LOXL2 mutants. Increased Snail1 binding was observed in the presence of either ΔLOXL2 (A) or H626/628Q (B) mutant compared to the binding found when each factor was expressed individually in HEK293T cells.

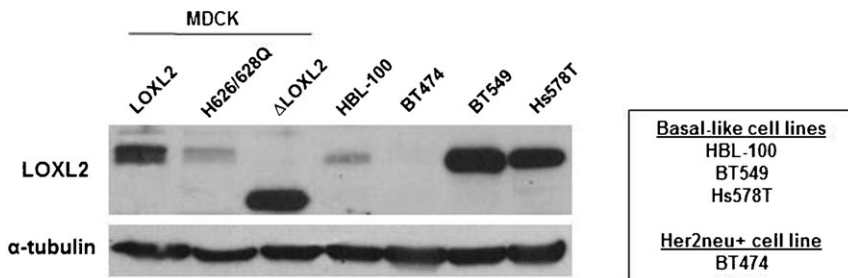

**Fig. S2. Ectopic LOXL2 expression in MDCK cells compared to endogenous LOXL2 level in basal-like breast cancer cells.** Western blot analyses of whole cell extracts from MDCK cells stably expressing wild-type LOXL2 and LOXL2i mutants, and the indicated human breast cells for LOXL2 using anti-LOXL2 antibodies. α-tubulin was used as a loading control. Among the basal-like cells, HBL-100 are non-tumorigenic and the rest are tumorigenic. As a LOXL2 negative control, breast ErbB2+ cells were analysed (Moreno-Bueno et al., 2011).

**Table S1. Antibodies used in Western blot, immunofluorescence and immunoprecipitation assays.**

| Antibody                    | Host   | Application |        |       | Source                            |
|-----------------------------|--------|-------------|--------|-------|-----------------------------------|
|                             |        | WB          | IF     | IP    |                                   |
| <b>Primary antibodies</b>   |        |             |        |       |                                   |
| E-cadherin (ECCD-2)         | Rat    | 1:1000      | 1:100  |       | M. Takeichi, Ricken Center, Japan |
| N-cadherin (3B9)            | Mouse  | 1:500       |        |       | Zymed Laboratories                |
| fibronectin                 | Rabbit | 1:1000      |        |       | Chemicon International            |
| vimentin (V9)               | Mouse  | 1:1000      | 1:100  |       | Dako                              |
| $\alpha$ -vinculin          | Mouse  |             | 1:100  |       | Sigma-Aldrich                     |
| ZO-1                        | Rabbit |             | 1:100  |       | Zymed                             |
| LOXL2                       | Rabbit | 1:1000      | 1:100  | 1:200 | K. Csiszar (Hollosi et al., 2009) |
| Snail1                      | Mouse  | 1:1000      | 1:100  |       | Cell Signaling                    |
| Flag (M2)                   | Mouse  | 1:1000      | 1:100  |       | Sigma-Aldrich                     |
| HA                          | Rat    | 1:1000      | 1:100  |       | Roche                             |
| pFAK                        | Rabbit | 1:500       | 1:100  |       | Cell Signaling                    |
| FAK                         | Mouse  | 1:1000      |        |       | BD Transduction                   |
| pSrc                        | Rabbit | 1:1000      | 1:100  |       | Abcam                             |
| Src                         | Rabbit | 1:1000      |        |       | Cell Signaling                    |
| Histone H3                  | Rabbit |             | 1:100  |       | Santa Cruz                        |
| $\alpha$ -tubulin (DM1A)    | Mouse  | 1:10,000    |        |       | Sigma-Aldrich                     |
| <b>Secondary antibodies</b> |        |             |        |       |                                   |
| rabbit-HRP                  | Donkey | 1:8000      |        |       | GE Healthcare                     |
| mouse-HRP                   | Sheep  | 1:8000      |        |       | GE Healthcare                     |
| rat-HRP                     | Goat   | 1:8000      |        |       | GE Healthcare                     |
| rat Alexa 488/546           | Goat   |             | 1:1000 |       | Molecular Probes                  |
| rabbit Alexa 488/546        | Goat   |             | 1:1000 |       | Molecular Probes                  |
| mouse Alexa 488/546         | Goat   |             | 1:1000 |       | Molecular Probes                  |

HRP = horseradish peroxidase; WB = Western blot; IF = Immunofluorescence; IP = Immunoprecipitation.
